# Supplementary material for: Size-based detection of sarcoma circulating tumor cells and cell clusters
Source: PubMed Central journal article supplement (PMC5668012; doi:10.18632/oncotarget.20697), 2017-08-24
Supplement: oncotarget-08-78965-s001.pdf [file oncotarget-08-78965-s001.pdf]

## Size-based detection of sarcoma circulating tumor cells and cell clusters

### SUPPLEMENTARY MATERIALS

### REFERENCES

1. Jin Z, Lahat G, Korchin B, Nguyen T, Zhu QS, Wang X, Lazar AJ, Trent J, Pollock RE, Lev D. Midkine enhances soft-tissue sarcoma growth: a possible novel therapeutic target. *Clin Cancer Res.* 2008; 14:5033-5042.
2. Rouillard AD, Gundersen GW, Fernandez NF, Wang Z, Monteiro CD, McDermott MG, Ma'ayan A. The harmonizome: a collection of processed datasets gathered to serve and mine knowledge about genes and proteins. *Database (Oxford).* 2016; 2016.
3. Gluer S, Schelp C, von Schweinitz D, Gerardy-Schahn R. Polysialylated neural cell adhesion molecule in childhood rhabdomyosarcoma. *Pediatr Res.* 1998; 43:145-147.
4. Yu Y, Davicioni E, Triche TJ, Merlino G. The homeoprotein six1 transcriptionally activates multiple protumorigenic genes but requires ezrin to promote metastasis. *Cancer Res.* 2006; 66:1982-1989.
5. Sana J, Zambo I, Skoda J, Neradil J, Chlapek P, Hermanova M, Mudry P, Vasikova A, Zitterbart K, Hampl A, Sterba J, Veselska R. CD133 expression and identification of CD133/nestin positive cells in rhabdomyosarcomas and rhabdomyosarcoma cell lines. *Anal Cell Pathol (Amst).* 2011; 34303-318.
6. Chastre E, Abdessamad M, Kruglov A, Bruyneel E, Bracke M, Di Gioia Y, Beckerle MC, van Roy F, Kotelevets L. TRIP6, a novel molecular partner of the MAGI-1 scaffolding molecule, promotes invasiveness. *FASEB J.* 2009; 23916-928.
7. Liu Y, Zhang JB, Qin Y, Wang W, Wei L, Teng Y, Guo L, Zhang B, Lin Z, Liu J, Ren ZG, Ye QH, Xie Y. PROX1 promotes hepatocellular carcinoma metastasis by way of up-regulating hypoxia-inducible factor 1alpha expression and protein stability. *Hepatology.* 2013; 58:692-705.

**Supplementary Table 1: Clinical characteristics of patients evaluated at diagnosis**

| <b>Diagnosis</b>   | <b>Disease Status</b>   | <b>CTC</b> | <b>CTC Clusters</b> |
|--------------------|-------------------------|------------|---------------------|
| ARMS               | Metastatic (bone)       | 2          | 0                   |
| ARMS               | Localized               | 446        | 28                  |
| ERMS               | Metastatic (peritoneum) | 26         | 3                   |
| ERMS               | Metastatic (lungs)      | 272        | 14                  |
| Ewing sarcoma      | Localized               | 11         | 16                  |
| Ewing sarcoma      | Localized               | 0          | 1                   |
| Ewing sarcoma      | Localized               | 1          | 8                   |
| Ewing sarcoma      | Metastatic (lungs)      | 1          | 0                   |
| Ewing sarcoma      | Localized               | 8          | 3                   |
| Ewing sarcoma      | Localized               | 179        | 89                  |
| MPNST              | Localized               | 248        | 38                  |
| Myxoid liposarcoma | Localized               | 3          | 0                   |
| Chondrosarcoma     | Metastatic              | 0          | 0                   |
| DSRCT              | Widely metastatic       | 0          | 0                   |
| Osteosarcoma       | Localized               | 2          | 0                   |
| Osteosarcoma       | Localized               | 3          | 0                   |
| Synovial sarcoma   | Localized               | 242        | 82                  |
| Synovial sarcoma   | Localized               | 6          | 1                   |

**Supplementary Table 2: Genes upregulated in ARMS CTC that are involved in cell-cell adhesion, cytoskeletal dynamics, migration, or metastasis**

| Gene   | Description                                                                                                                                   |
|--------|-----------------------------------------------------------------------------------------------------------------------------------------------|
| MDK    | Secreted growth factor. ALK ligand. Promotes migration/proliferation/angiogenesis. Implicated in RMS by Jin et al. [1]                        |
| STMN1  | Destabilizes microtubules                                                                                                                     |
| MAP1B  | Associated with neurite outgrowth, membrane blebbing, and intracellular vesicular transport; Has a PAX3/FKHR binding site in the promoter [2] |
| DST    | Anchors intermediate filaments to the actin cytoskeleton; integrin binding.                                                                   |
| CALD1  | Regulates actin/myosin interactions in smooth muscle;                                                                                         |
| NCAM1  | Regulates cell/cell adhesion; expressed in RMS [3]                                                                                            |
| LMNA   | Intermediate filament protein, component of the nuclear lamina                                                                                |
| ENAH   | Role in cytoskeletal remodeling/dynamics, especially lamellipodial and filopodial dynamics in migrating cells                                 |
| DCX    | Microtubule binding protein involved in neuronal migration;                                                                                   |
| SIX1   | Required for normal development of migratory myogenic progenitor cells and promotes metastasis in a mouse model of RMS [4]                    |
| STMN2  | Destabilizes microtubules                                                                                                                     |
| NES    | Intermediate filament protein; Marker of neuronal stem cells; Co-expression of Nestin and CD133 marks cancer stem cells, including in RMS [5] |
| MAGI1  | Important for regulating cell-cell contacts; Has a PAX3/FKHR binding site in the promoter [2]; May be involved in cell invasiveness [6]       |
| EFNB2  | Transmembrane signaling protein; crucial for migration and adhesion;                                                                          |
| TTL7   | Regulates microtubule dynamics                                                                                                                |
| PROX1  | Specifically implicated in metastasis [7]                                                                                                     |
| TPM2   | Actin-binding protein                                                                                                                         |
| RPSA   | High affinity non-integrin laminin binding protein/receptor implicated in metastasis                                                          |
| MALAT1 | lncRNA transcriptional regulator; implicated in metastasis;                                                                                   |
| TMSB10 | Actin binding protein that sequesters G actin;                                                                                                |
| MYL6   | Myosin light chain 6                                                                                                                          |
| PFN1   | Actin binding protein regulated by extracellular signals;                                                                                     |
| CFL1   | Regulates actin polymerization; found in invadopodia and lamellipodia; downstream of RhoA and ROCK                                            |

**Supplementary Table 3: GO Analysis of Biological Processes**

| Pathway Description                       | Count | False Discovery Rate |
|-------------------------------------------|-------|----------------------|
| Movement of cell or subcellular component | 16    | 0.000227             |
| Protein complex subunit organization      | 16    | 0.000453             |
| Response to wounding                      | 11    | 0.00196              |
| Translational termination                 | 6     | 0.00343              |
| Cell projection morphogenesis             | 10    | 0.0067               |
| Cytoskeletal organization                 | 10    | 0.0111               |
| Actin filament-based process              | 7     | 0.0196               |
| Skeletal myofibril assembly               | 2     | 0.0198               |
| Muscle filament sliding                   | 3     | 0.0248               |

**Supplementary Table 4: PCR Primers**

| Primer       | Sequence                      |
|--------------|-------------------------------|
| P53 primer F | 5'-tctgtgactgcacgtactc-3'     |
| P53 primer R | 5'-cacggatctgaagggtgaaaa-3'   |
| EWS ESBP1    | 5'-cgactagtatgatcagagcagt-3'  |
| Fli1 ESBP2   | 5'-ccgttgctctgtattcttactga-3' |
